# Supplementary material
Source: PubMed Central journal article supplement (PMC5820134)
Supplement: NIHMS924141-supplement-Supplement_3.pdf [file NIHMS924141-supplement-Supplement_3.pdf]

Supplementary information S3 | **Experimental probing of cellular IRES RNA structures**

Experimental methods applied to probing cellular IRES structures, sorted chronologically and indicating where their functional relevance has been tested by compensatory mutagenesis. To our knowledge, the RNA structures of the IRESs of vascular endothelial growth factor A (VEGFA), immunoglobulin heavy chain binding protein (BiP) and fibroblast growth factor 9 (FGF9) have not yet been examined.

| IRES mRNA*    | Biological role of protein   | Probing method**                      | Probe***                            | Has the RNA structure model been tested?                                                                                                                                                                    | Compensatory mutagenesis | Refs  |
|---------------|------------------------------|---------------------------------------|-------------------------------------|-------------------------------------------------------------------------------------------------------------------------------------------------------------------------------------------------------------|--------------------------|-------|
| <b>c-myc</b>  | proliferation, apoptosis     | chemical probing                      | DMS, kethoxal, CMCT                 | structural deletions and mutagenesis, structure model: two domain structure and pseudoknot                                                                                                                  | yes                      | 1     |
| <b>IGF2</b>   | proliferation, development   | chemical probing                      | DMS, kethoxal, CMCT                 | structure model                                                                                                                                                                                             | -                        | 2     |
| <b>Apaf1</b>  | apoptosis                    | chemical and enzymatic probing        | DMS, kethoxal, CMCT, RNase V1       | structure model, DMS probing in presence of ITAFs UNR and nPTB to map binding sites, structure changes upon binding, structural mutants abolish ITAF binding                                                | -                        | 3     |
| <b>CAT1</b>   | proliferation, cell survival | chemical and enzymatic probing        | RNase T1, T1/A, V1; DEPC/aniline    | structure model in presence and absence of uORF translation, analysis of uORF stop codon mutants in IRES                                                                                                    | yes                      | 4,5   |
| <b>FGF2</b>   | development                  | chemical and enzymatic probing        | DMS, kethoxal, CMCT, RNase T1, V1   | structure model: two stem-loops and RG4; structural mutagenesis: domain deletion and loop mutations; cation-dependent RT termination to probe RG4 structure in IRES                                         | yes                      | 6     |
| <b>Bag1</b>   | cell survival, apoptosis     | chemical and enzymatic probing        | DMS, kethoxal, RNase V1             | structure model, DMS, kethoxal, V1 probing in presence of ITAFs PTB and PCBP1 to map binding sites, structure changes upon binding, probing of structural mutants at binding site that abolish ITAF binding | -                        | 7     |
| <b>FGF1A</b>  | angiogenesis and metastasis  | chemical and enzymatic probing        | DMS, CMCT, RNase T1, T2, V1         | structure model, probing of human IRES; model for six mammalian species, two stem-loops conserved in mammals; domain and point mutations in human IRES                                                      | yes                      | 8     |
| <b>L-myc</b>  | proliferation                | chemical and enzymatic probing        | DMS, kethoxal, CMCT, RNase V1       | structure model, predicted pseudoknot                                                                                                                                                                       | -                        | 9     |
| <b>XIAP</b>   | cell survival, apoptosis     | chemical and enzymatic probing        | NMIA, RNase T1, T2, A, V1           | structure model, structural deletions and mutagenesis                                                                                                                                                       | -                        | 10    |
| <b>N-myc</b>  | proliferation, development   | chemical and enzymatic probing        | DMS, kethoxal, RNase V1             | structure model                                                                                                                                                                                             | -                        | 11    |
| <b>cIAP1</b>  | cell survival                | enzymatic probing                     | RNase T1, T2, V1                    | structure model, DNA oligo bound to IRES structure competes with ITAF NF45 binding, structural mutagenesis to test ITAF binding                                                                             | yes                      | 12    |
| <b>p53</b>    | cell cycle                   | chemical and enzymatic probing        | DMS, RNase T1, V1                   | structure model, enzymatic probing of WT and mutant structure with cancer-derived silent mutations that change structure, reduced IRES activity of mutants, 5'-3' UTR interaction by base pairing           | limited                  | 13,14 |
| <b>VEGF-C</b> | angiogenesis and metastasis  | chemical and enzymatic probing, SHAPE | DMS, RNase T1, T2, V1; BzCN (SHAPE) | structure model, SHAPE analysis of mouse and human structure                                                                                                                                                | -                        | 15    |

|              |                             |                                                    |                                |                                                                                                                        |     |       |
|--------------|-----------------------------|----------------------------------------------------|--------------------------------|------------------------------------------------------------------------------------------------------------------------|-----|-------|
| <b>Hoxa</b>  | development                 | chemical probing, SHAPE, mutate-and-map, MOHCA-Seq | 1M7 (SHAPE)                    | structure model, SHAPE of Hoxa5 and Hoxa9 IRES, pseudoknot; mutate-and-map, MOHCA-seq, structural mutagenesis of Hoxa9 | yes | 16,17 |
| <b>VEGFD</b> | angiogenesis and metastasis | chemical and enzymatic probing, SHAPE              | RNase T1, T2, V1; BzCN (SHAPE) | structure model, SHAPE of VEGF-D 5' UTR, predicted pseudoknot                                                          | -   | 18    |

\* IRES-containing mRNAs: IGF2, insulin-like growth factor 2; Apaf1, apoptotic protease activating factor 1; CAT1, cationic amino acid transporter 1; FGF, fibroblast growth factor; Bag1, BCL2-associated athanogene 1; XIAP, X-linked inhibitor of apoptosis protein; c-IAP1, inhibitor of apoptosis protein; VEGF, vascular endothelial growth factor; Hoxa; Homeobox a.

\*\* Most RNA structures of cellular IRESs have been probed individually using chemical modification or enzymatic cleavage of RNA, reverse transcription (RT) and analysis of primer extension products *in vitro*. The accessibility of an RNA nucleotide for a probe or an enzyme indicates whether an RNA molecule is base-paired.

\*\*\* Reagents and enzymes adapted to modify single-stranded bases in RNA show nucleotide selectivity: DMS, dimethyl sulfate: A, C, G; CMCT, 1-cyclohexyl-(2-morpholinoethyl)carbodiimide metho-p-toluene sulfonate: U; kethoxal: G; lead, Pb<sup>2+</sup>: non-specific. Single-strand RNA-specific nucleases cleave the following substrates: RNase T1: after unpaired G; RNase T2: non-specific with preference for A; RNase A: after C and U, RNase I: non-specific; RNase S1: non-specific; and double-strand specific RNase V1. SHAPE uses the probe N-methylisatoic anhydride (NMIA), its derivative 1-methyl-7-nitroisatoic anhydride (1M7), or benzoyl cyanide (BzCN) to mark the 2'OH of flexible, single-stranded RNA positions at all four nucleotides<sup>19</sup>.

## References:

1. Le Quesne, J. P., Stoneley, M., Fraser, G. A., Willis, A. E. Derivation of a structural model for the c-myc IRES. *J. Mol. Biol.* **310**, 111–126 (2001).
2. Pedersen, S. K., Christiansen, J., Hansen, T., Larsen, M. R. & Nielsen, F. C. Human insulin-like growth factor II leader 2 mediates internal initiation of translation. *Biochem J* **363**, 37–44 (2002).
3. Mitchell, S. A., Spriggs, K. A., Coldwell, M. J., Jackson, R. J. & Willis, A. E. The Apaf-1 internal ribosome entry segment attains the correct structural conformation for function via interactions with PTB and unr. *Mol. Cell* **11**, 757–771 (2003).
4. Yaman, I. *et al.* The zipper model of translational control: A small upstream ORF is the switch that controls structural remodeling of an mRNA leader. *Cell* **113**, 519–531 (2003).
5. Fernandez, J. *et al.* Ribosome stalling regulates ires-mediated translation in eukaryotes, a parallel to prokaryotic attenuation. *Mol. Cell* **17**, 405–416 (2005).
6. Bonnal, S. *et al.* A single internal ribosome entry site containing a G quartet RNA structure drives fibroblast growth factor 2 gene expression at four alternative translation initiation codons. *J. Biol. Chem.* **278**, 39330–39336 (2003).
7. Pickering, B. M., Mitchell, S. A., Spriggs, K. A., Willis, A. E. & Stoneley, M. Bag-1 internal ribosome entry segment activity is promoted by structural changes mediated by poly(rC) binding protein 1 and recruitment of polypyrimidine tract binding protein 1. *Mol. Cell. Biol.* **24**, 5595–5605 (2004).
8. Martineau, Y. *et al.* Internal ribosome entry site structural motifs conserved among mammalian Fibroblast Growth Factor 1 alternatively spliced mRNAs. *Mol. Cell. Biol.* **24**, 7622–7635 (2004).
9. Jopling, C. L., Spriggs, K. A., Mitchell, S. A., Stoneley, M. & Willis, A. E. L-Myc protein synthesis is initiated by internal ribosome entry. *RNA* **10**, 287–298 (2004).
10. Baird, S. D., Lewis, S. M., Turcotte, M. & Holcik, M. A search for structurally similar cellular internal ribosome entry sites. *Nucleic Acids Res.* **35**, 4664–4677 (2007).
11. Spriggs, K. A. *et al.* Canonical initiation factor requirements of the Myc family of internal ribosome entry segments. *Mol. Cell. Biol.* **29**, 1565–1574 (2009).
12. Graber, T. E., Baird, S. D., Kao, P. N., Mathews, M. B. & Holcik, M. NF45 functions as an IRES trans-acting factor that is required for translation of cIAP1 during the unfolded protein response. *Cell Death Differ.* **17**, 719–729 (2010).
13. Chen, J. & Kastan, M. B. 5'-3'-UTR interactions regulate p53 mRNA translation and provide a target for modulating p53 induction after DNA damage. *Genes Dev.* **24**, 2146–2156 (2010).

14. Grover, R., Sharathchandra, A., Ponnuswamy, A., Khan, D. & Das, S. Effect of mutations on the p53 IRES RNA structure: Implications for de-regulation of the synthesis of p53 isoforms. *RNA Biol.* **8**, 132–142 (2011).
15. Morfoisse, F. *et al.* Hypoxia induces VEGF-C expression in metastatic tumor cells via a HIF-1 $\alpha$ -independent translation-mediated mechanism. *Cell Rep.* **6**, 155–167 (2014).
16. Xue, S. *et al.* RNA regulons in Hox 5' UTRs confer ribosome specificity to gene regulation. *Nature* **517**, 33–38 (2015).
17. Cheng, C. Y. *et al.* Consistent global structures of complex RNA states through multidimensional chemical mapping. *Elife* **4**, 1–38 (2015).
18. Morfoisse, F. *et al.* Nucleolin promotes heat shock-associated translation of VEGF-D to promote tumor lymphangiogenesis. *Cancer Res.* **76**, 4394–4405 (2016).
19. Merino, E. J., Wilkinson, K. A., Coughlan, J. L. & Weeks, K. M. RNA structure analysis at single nucleotide resolution by Selective 2'-Hydroxyl Acylation and Primer Extension (SHAPE). *J. Am. Chem. Soc.* **127**, 4223–4231 (2005).
